# Supplementary material for: Differential response of digesta- and mucosa-associated intestinal microbiota to dietary insect meal during the seawater phase of Atlantic salmon
Source: Anim Microbiome. 2021 Jan 7;3:8. doi: 10.1186/s42523-020-00071-3 (PMC7934271; doi:10.1186/s42523-020-00071-3)
Supplement: Supplementary file 2 — Additional file 2: Table S1. Contaminating features removed from the ASV table. [file 42523_2020_71_MOESM2_ESM.xlsx]

## Sheet: Table S1
Table S1. Contaminating features removed from the ASV table.
FeatureID	Taxonomy	Extraction-blank1	Extraction-blank2	Extraction-blank3	Extraction-blank4	Library-blank1	Library-blank2
ATTGAACGCTGGCGGCAGGCCTAACACATGCAAGTCGAGCGGTAGAGAGAAGCTTGCTTCTCTTGAGAGCGGCGGACGGGTGAGTAATGCCTAGGAATCTGCCTGGTAGTGGGGGATAACGTTCGGAAACGGACGCTAATACCGCATACGTCCTACGGGAGAAAGCAGGGGACCTTCGGGCCTTGCGCTATCAGATGAGCCTAGGTCGGATTAGCTAGTTGGTGAGGTAATGGCTCACCAAGGCGACGATCCGTAACTGGTCTGAGAGGATGATCAGTCACACTGGAACTGAGACACGGTCCAG	k__Bacteria; p__Proteobacteria; c__Gammaproteobacteria; o__Pseudomonadales; f__Pseudomonadaceae; g__Pseudomonas; NA	0.950514	0.961414	0.945453	0.960905	0.955135	0.969783
ATTGAACGCTGGTGGCAGGCCTAACACATGCAAGTCGAGCGGTAGAGAGAAGCTTGCTTCTCTTGAGAGCGGCGGACGGGTGAGTAATGCCTAGGAATCTGCCTGGTAGTGGGGGATAACGTTCGGAAACGGACGCTAATACCGCATACGTCCTACGGGAGAAAGCAGGGGACCTTCGGGCCTTGCGCTATCAGATGAGCCTAGGTCGGATTAGCTAGTTGGTGAGGTAATGGCTCACCAAGGCGACGATCCGTAACTGGTCTGAGAGGATGATCAGTCACACTGGAACTGAGACACGGTCCAG	k__Bacteria; p__Proteobacteria; c__Gammaproteobacteria; o__Pseudomonadales; f__Pseudomonadaceae; g__Pseudomonas; NA	0.0285486	0.0281275	0.0266102	0.0272946	0.0243781	0.0265074
GACGAACGCTGGCGGCGTGCTTAACACATGCAAGTCGAACGATGATGCCCAGCTTGCTGGGTTGATTAGTGGCGAACGGGTGAGTAACACGTGAGTAACCTGCCCCTGACTCTGGGATAAGCGTTGGAAACGACGTCTAATACTGGATATGATCACTGGTCGCATGGCCTGGTGGTGGAAAGATTTTTTGGTTGGGGATGGACTCGCGGCCTATCAGCTTGTTGGTGAGGTAATGGCTCACCAAGGCGACGACGGGTAGCCGGCCTGAGAGGGTGACCGGCCACACTGGGACTGAGACACGGCCCAG	k__Bacteria; p__Actinobacteria; c__Actinobacteria; o__Micrococcales; f__Microbacteriaceae; g__Curtobacterium; Ambiguous_taxa	0.00677307	0	0	0	0	0
GATGAACGCTGGCGGCGTGCCTAATACATGCAAGTCGAGCGCGAAGATCAGGAGCTTGCTCCTGAGATTCGAGCGGCGGACGGGTGAGTAACACGTAGGCAACCTACCCTTGAGATTGGGATAACTACCGGAAACGGTAGCTAATACCGGATACGACATTCCTGCATAAGTAAGAATGTTAAAAGGCGGATTTATCTGCCGCTCATGGATGGGCCTGCGGTGCATTAGCTAGTTGGTGAGATAGTAGCTCACCAAGGCGACGATGCATAGCCGACCTGAGAGGGTGATCGGCCACACTGGGACTGAGACACGGCCCAG	k__Bacteria; p__Firmicutes; c__Bacilli; o__Bacillales; f__Staphylococcaceae; g__Jeotgalicoccus; Ambiguous_taxa	0	0	0	0	0.00600306	0
GACGAACGCTGGCGGCGTGCTTAACACATGCAAGTCGAGCGAGGCCCATCTTCGGGTGGTGCCCTAGCGGCGAACGGGTGAGTAACACGTGGGCAACCTGCCCTCAGCTCTGGGATAACTCCAAGAAATTGGTGCTAATACCGGATGTGACCGCTGACCGCATGGTCTGGTGGTGGAAAGATTCATCGGCTGAGGATGGGCCCGCGGCCTATCAGCTTGTTGGTGGGGTAATGGCCCACCAAGGCGACGACGGGTAGCCGGCCTGAGAGGGTGACCGGCCACACTGGGACTGAGACACGGCCCAG	k__Bacteria; p__Actinobacteria; c__Actinobacteria; o__Frankiales; f__Geodermatophilaceae; g__Modestobacter; Ambiguous_taxa	0	0	0.00487867	0.000358862	0	0
GACGAACGCTGGCGGCGTGCTTAACACATGCAAGTCGAACGGAAAGGCCCTGCTTTTGTGGGGTGCTCGAGTGGCGAACGGGTGAGTAACACGTGAGTAACCTGCCCTTGACTTTGGGATAACTTCAGGAAACTGGGGCTAATACCGGATAGGAGCTCCTGCTGCATGGTGGGGGTTGGAAAGTTTCGGCGGTTGGGGATGGACTCGCGGCTTATCAGCTTGTTGGTGGGGTAGTGGCTTACCAAGGCTTTGACGGGTAGCCGGCCTGAGAGGGTGACCGGCCACATTGGGACTGAGATACGGCCCAG	k__Bacteria; p__Actinobacteria; c__Actinobacteria; o__Propionibacteriales; f__Propionibacteriaceae; g__Cutibacterium; NA	0.000568579	0.00267637	0.00460851	0.00365195	0	0
GATGAACGCTAGCGGCAGGCCTAATACATGCAAGTCGAACGGTCAGTAGCAATACTGATAGTGGCGCACGGGTGCGTAACACGTAACTAACCTACCTACAACTGGGGGATAGCCCGCCGAAAGGCGGATTAATACCGCATAAGCTACTTGGGTGGCATCACCTGGGTAGTAAAGATTTATTGGTTGTAGATGGGGTTGCGGGTCATTAGCTAGTTGGTTGGGTAATGGCTGACCAAGGCGACGATGACTAGGGGAGCTGAGAGGCTGGTCCCCCACACGGGCACTGAGATACGGGCCCG	k__Bacteria; p__Bacteroidetes; c__Bacteroidia; o__Cytophagales; f__Hymenobacteraceae; g__Hymenobacter; s__uncultured bacterium	0	0.00036651	0.00410793	0	0	0
AGCGAACGCTGGCGGCAGGCCTAACACATGCAAGTCGAACGAACCTTTCGGGGTTAGTGGCGGACGGGTGAGTAACACGTGGGAACGTGCCTTTAGGTTCGGAATAACTCAGGGAAACTTGTGCTAATACCGAATGTGCCCTTCGGGGGAAAGATTTATCGCCTTTAGAGCGGCCCGCGTCTGATTAGCTAGTTGGTGAGGTAAAGGCTCACCAAGGCGACGATCAGTAGCTGGTCTGAGAGGATGATCAGCCACATTGGGACTGAGACACGGCCCAA	k__Bacteria; p__Proteobacteria; c__Alphaproteobacteria; o__Caulobacterales; f__Caulobacteraceae; g__Brevundimonas; Ambiguous_taxa	0.00386035	0	0	0	1.6629e-05	0
GATGAACGCTAGCGGCAGGCCTAATACATGCAAGTCGAACGGTGGTAGCAATACCATAGTGGCGCACGGGTGCGTAACACGTAACTAACCTACCTACAACTGGGGGATAGCCCGCCGAAAGGCGGATTAATACCGCATAAGGCATGCGCCCGGCATCGGGTGTTTGTTAAAGATTTATTGGTTGTAGATGGGGTTGCGGGTCATTAGCTAGTTGGTTGGGTAATGGCTGACCAAGGCGACGATGACTAGGGGAGCTGAGAGGCTGGTCCCCCACACGGGCACTGAGATACGGGCCCG	k__Bacteria; p__Bacteroidetes; c__Bacteroidia; o__Cytophagales; f__Hymenobacteraceae; g__Hymenobacter; s__uncultured bacterium	0	0	0.00332925	0	0	0
GATGAACGCTAGCGGCAGGCCTAATACATGCAAGTCGAACGGTGGTAGCAATACCATAGTGGCGCACGGGTGCGTAACACGTAACTAACCTACCTACAACTGGGGGATAGCCCGCCGAAAGGCGGATTAATACCGCATAAGGCATGCGCCCGGCATCGGGTGTTTGTTAAAGATTTATTGGTTGTAGATGGGGTTGCGGGTCATTAGCTAGTTGGTTGGGTAACGGCTGACCAAGGCGACGATGACTAGGGGAGCTGAGAGGCTGGTCCCCCACACGGGCACTGAGATACGGGCCCG	k__Bacteria; p__Bacteroidetes; c__Bacteroidia; o__Cytophagales; f__Hymenobacteraceae; g__Hymenobacter; s__uncultured bacterium	0	0	0.00309088	0	0	0
AGCGAACGCTGGCGGCAGGCCTAACACATGCAAGTCGAACGAACCTTTCGGGGTTAGTGGCGGACGGGTGAGTAACACGTGGGAACGTGCCTTTAGGTTCGGAATAACTCAGGGAAACTTGTGCTAATACCGAATGTGCCCTTCGGGGGAAAGATTTATCGCCTTTAGAGCGGCCCGCGTCTGATTAGCTAGTTGGTTGAGGTAATGGCTCACCAAGGCGACGATCAGTAGCTGGTCTGAGAGGATGATCAGCCACATTGGGACTGAGACACGGCCCAA	k__Bacteria; p__Proteobacteria; c__Alphaproteobacteria; o__Caulobacterales; f__Caulobacteraceae; g__Brevundimonas; Ambiguous_taxa	0	0	0.002781	0.00101326	0	0.0005399
ATTGAACGCTGGCGGCAGGCCTAACACATGCAAGTCGAGCGGTAGAGAGAAGCTTGCTTCTCTTGAGAGCGGCGGACGGGTGAGTAATGCCTAGGAATCTGCCTGGTAGTGGGGGATAACGTTCGGAAACGGACGCTAATACCGCATACGTCCTACGGGAGAAAGCAGGGGACCTTCGGGCCTTGTGCTATCAGATGAGCCTAGGTCGGATTAGCTAGTTGGTGAGGTAATGGCTCACCAAGGCGACGATCCGTAACTGGTCTGAGAGGATGATCAGTCACACTGGAACTGAGACACGGTCCAG	k__Bacteria; p__Proteobacteria; c__Gammaproteobacteria; o__Pseudomonadales; f__Pseudomonadaceae; g__Pseudomonas; NA	0.00125686	0.000929059	0.00189108	0.00196319	0.00172941	0.00134104
GATGAACGCTGGCGGCGTGCTTAACACATGCAAGTCGAACGATGAAGCCCAGCTTGCTGGGTGGATTAGTGGCGAACGGGTGAGTAACACGTGAGTAACCTGCCCTTAACTCTGGGATAAGCCTGGGAAACTAGGTCTAATACCGGATAGGAGCGCCTACCGCATGGTGGGTGTTGGAAAGATTTATCGGTTTTGGATGGACTCGCGGCCTATCAGCTTGTTGGTGAGGTAATGGCTCACCAAGGCGACGACGGGTAGCCGGCCTGAGAGGGTGACCGGCCACACTGGGACTGAGACACGGCCCAG	k__Bacteria; p__Actinobacteria; c__Actinobacteria; o__Micrococcales; f__Micrococcaceae; g__Micrococcus; Ambiguous_taxa	0.00185536	0	0	0	0	0
GATGAACGCTAGCGGCAGGCCTAATACATGCAAGTCGAACGGTGGTAGCAATACCATAGTGGCGCACGGGTGCGTAACACGTAACTAACCTACCTACAACTGGGGGATAGCCCGCCGAAAGGCGGATTAATACCGCATAAGCTACTTGGGTGGCATCACCTGGATAGTAAAGATTTATTGGTTGTAGATGGGGTTGCGGGTCATTAGCTAGTTGGTTGGGTAATGGCTGACCAAGGCGACGATGACTAGGGGAGCTGAGAGGCTGGTCCCCCACACGGGCACTGAGATACGGGCCCG	k__Bacteria; p__Bacteroidetes; c__Bacteroidia; o__Cytophagales; f__Hymenobacteraceae; g__Hymenobacter; s__uncultured bacterium	0	0	0	0.00175209	0	0
AACGAACGCTGGCGGCATGCCTAACACATGCAAGTCGAACGATGCTTTCGGGCATAGTGGCGCACGGGTGCGTAACGCGTGGGAATCTGCCCTTGGGTTCGGAATAACAGTTGGAAACGACTGCTAATACCGGATGATGTCGATAAGACCAAAGATTTATCGCCTGAGGATGAGCCCGCGTTGGATTAGCTAGTTGGTGGGGTAAAGGCCTACCAAGGCGACGATCCATAGCTGGTCTGAGAGGATGATCAGCCACACTGGGACTGAGACACGGCCCAG	k__Bacteria; p__Proteobacteria; c__Alphaproteobacteria; o__Sphingomonadales; f__Sphingomonadaceae; g__Sphingomonas; Ambiguous_taxa	0.00141646	0	0	0	0	0
ATTGAACGCTGGCGGCAGGCCTAACACATGCAAGTCGAGCGGTAGAGAGAAGCTTGCTTCTCTTGAGAGCGGCGGACGGGTGAGTAATGCCTAGGAATCTGCCTGGTAGTGGGGGATAACGTTCGGAAACGGACGCTAATACCACATACGTCCTACGGGAGAAAGCAGGGGACCTTCGGGCCTTGCGCTATCAGATGAGCCTAGGTCGGATTAGCTAGTTGGTGAGGTAATGGCTCACCAAGGCGACGATCCGTAACTGGTCTGAGAGGATGATCAGTCACACTGGAACTGAGACACGGTCCAG	k__Bacteria; p__Proteobacteria; c__Gammaproteobacteria; o__Pseudomonadales; f__Pseudomonadaceae; g__Pseudomonas; NA	0.000668329	0.000571073	0.000842246	0.000823271	0.000964481	0.000626981
AACGAACGCTGGCGGCATGCCTAACACATGCAAGTCGAACGAGACTCTTCGGGGTCTAGTGGCGCACGGGTGCGTAACGCGTGGGAATCTGCCCTTGGGTTCGGAATAACAGTTGGAAACGACTGCTAATACCGGATGATGTCGATAAGACCAAAGATTTATCGCCTGAGGATGAGCCCGCGTAAGATTAGGTAGTTGGTGGGGTAAAGGCCTACCAAGCCGACGATCTTTAGCTGGTCTGAGAGGATGATCAGCCACACTGGGACTGAGACACGGCCCAG	k__Bacteria; p__Proteobacteria; c__Alphaproteobacteria; o__Sphingomonadales; f__Sphingomonadaceae; g__Sphingomonas; Ambiguous_taxa	0.000798005	0	0	0	0	0
AACGAACGCTGGCGGCAGGCTTAACACATGCAAGTCGAACGCCCCGCAAGGGGAGTGGCAGACGGGTGAGTAACGCGTGGGAATCTACCTAGAACTACGGAACAACTGATGGAAACGTCAGCTAATACCGTATACGCCCTACGGGGGAAAGATTTATCGGTTTTAGATGAGCCCGCGTAAGATTAGCTAGTTGGTGAGGTAATGGCTCACCAAGGCGACGATCTTTAGCTGGTCTGAGAGGATGATCAGCCACACTGGGACTGAGACACGGCCCAG	k__Bacteria; p__Proteobacteria; c__Alphaproteobacteria; o__Rhizobiales; f__Devosiaceae; g__Devosia; NA	0	0	0	0.000401081	0	0
AATGAACGCTGGCGGCATGCCTAACACATGCAAGTCGAACGAAGGCTTCGGCCTTAGTGGCGCACGGGTGCGTAACGCGTGGGAATCTGCCCCTTGGTTCGGAATAACAGTTGGAAACGACTGCTAATACCGGATGACGACGTAAGTCCAAAGATTTATCGCCGAGGGATGAGCCCGCGTAGGATTAGGTAGTTGGTGTGGTAAAGGCGCACCAAGCCGACGATCCTTAGCTGGTCTGAGAGGATGATCAGCCACACTGGGACTGAGACACGGCCCAG	k__Bacteria; p__Proteobacteria; c__Alphaproteobacteria; o__Sphingomonadales; f__Sphingomonadaceae; g__Sphingomonas; s__Sphingomonas aurantiaca	0	0.000383557	0	0	0	0
ATTGAACGAGGGAGGAAGGAATAAAAAATGCAAGTAGAGCGGTAGAGAGAAGCTTGCTTCTCTTGAGAGCGGCGGACGGGTGAGTAATGCCTAGGAATCTGCCTGGTAGTGGGGGATAACGTTCGGAAACGGACGCTAATACCGCATACGTCCTACGGGAGAAAGCAGGGGACCTTCGGGCCTTGCGCTATCAGATGAGCCTAGGTCGGATTAGCTAGTTGGTGAGGTAATGGCTCACCAAGGCGACGATCCGTAACTGGTCTGAGAGGATGATCAGTCACACTGGAACTGAGACACGGTCCAG	k__Bacteria; p__Proteobacteria; c__Gammaproteobacteria; o__Pseudomonadales; f__Pseudomonadaceae; g__Pseudomonas; NA	5.98504e-05	7.67113e-05	0.00011124	0.000211095	8.31449e-05	0.000104497
CTTTCCCTCTGGCGGCAGGCCTAACACATGCAAGTCGAGCGGTAGAGAGAAGCTTGCTTCTCTTGAGAGCGGCGGACGGGTGAGTAATGCCTAGGAATCTGCCTGGTAGTGGGGGATAACGTTCGGAAACGGACGCTAATACCGCATACGTCCTACGGGAGAAAGCAGGGGACCTTCGGGCCTTGCGCTATCAGATGAGCCTAGGTCGGATTAGCTAGTTGGTGAGGTAATGGCTCACCAAGGCGACGATCCGTAACTGGTCTGAGAGGATGATCAGTCACACTGGAACTGAGACACGGTCCAG	k__Bacteria; p__Proteobacteria; c__Gammaproteobacteria; o__Pseudomonadales; f__Pseudomonadaceae; g__Pseudomonas; NA	0.000169576	0.000119329	6.35657e-05	0.000147767	9.97738e-05	6.96646e-05
AGCGAACGCTGGTGGCAGGCCTAACACATGCAAGTCGAACGAACCTTTCGGGGTTAGTGGCGGACGGGTGAGTAACACGTGGGAACGTGCCTTTAGGTTCGGAATAACTCAGGGAAACTTGTGCTAATACCGAATGTGCCCTTCGGGGGAAAGATTTATCGCCTTTAGAGCGGCCCGCGTCTGATTAGCTAGTTGGTTGAGGTAATGGCTCACCAAGGCGACGATCAGTAGCTGGTCTGAGAGGATGATCAGCCACATTGGGACTGAGACACGGCCCAA	k__Bacteria; p__Proteobacteria; c__Alphaproteobacteria; o__Caulobacterales; f__Caulobacteraceae; g__Brevundimonas; Ambiguous_taxa	0	0	0.000127131	6.33285e-05	0	5.22484e-05
ATTGAACGCTTGCTTCCTGCCTCCCCCCTTTATGTCGAGCGGTAGAGAGAAGCTTGCTTCTCTTGAGAGCGGCGGACGGGTGAGTAATGCCTAGGAATCTGCCTGGTAGTGGGGGATAACGTTCGGAAACGGACGCTAATACCGCATACGTCCTACGGGAGAAAGCAGGGGACCTTCGGGCCTTGCGCTATCAGATGAGCCTAGGTCGGATTAGCTAGTTGGTGAGGTAATGGCTCACCAAGGCGACGATCCGTAACTGGTCTGAGAGGATGATCAGTCACACTGGAACTGAGACACGGTCCAG	k__Bacteria; p__Proteobacteria; c__Gammaproteobacteria; o__Pseudomonadales; f__Pseudomonadaceae; g__Pseudomonas; NA	9.97506e-06	8.52348e-06	1.58914e-05	8.44381e-05	3.32579e-05	5.22484e-05
AGCGAACGCTGGTGGCAGGCCTAACACATGCAAGTCGAACGAACCTTTCGGGGTTAGTGGCGGACGGGTGAGTAACACGTGGGAACGTGCCTTTAGGTTCGGAATAACTCAGGGAAACTTGTGCTAATACCGAATGTGCCCTTCGGGGGAAAGATTTATCGCCTTTAGAGCGGCCCGCGTCTGATTAGCTAGTTGGTGAGGTAAAGGCTCACCAAGGCGACGATCAGTAGCTGGTCTGAGAGGATGATCAGCCACATTGGGACTGAGACACGGCCCAA	k__Bacteria; p__Proteobacteria; c__Alphaproteobacteria; o__Caulobacterales; f__Caulobacteraceae; g__Brevundimonas; NA	5.98504e-05	0	0	0	0	0
ATTGAACGCTTGCTTCCTGCCTCCCCCCTTTTTGTCGAGCGGTAGAGAGAAGCTTGCTTCTCTTGAGAGCGGCGGACGGGTGAGTAATGCCTAGGAATCTGCCTGGTAGTGGGGGATAACGTTCGGAAACGGACGCTAATACCGCATACGTCCTACGGGAGAAAGCAGGGGACCTTCGGGCCTTGCGCTATCAGATGAGCCTAGGTCGGATTAGCTAGTTGGTGAGGTAATGGCTCACCAAGGCGACGATCCGTAACTGGTCTGAGAGGATGATCAGTCACACTGGAACTGAGACACGGTCCAG	k__Bacteria; p__Proteobacteria; c__Gammaproteobacteria; o__Pseudomonadales; f__Pseudomonadaceae; g__Pseudomonas; NA	1.99501e-05	8.52348e-06	4.76743e-05	0	0	5.22484e-05
ATTGAACGCTTTCTTCCTTCCTAACACATGCAAGTCGAGCGGTAGAGAGAAGCTTGCTTCTCTTGAGAGCGGCGGACGGGTGAGTAATGCCTAGGAATCTGCCTGGTAGTGGGGGATAACGTTCGGAAACGGACGCTAATACCGCATACGTCCTACGGGAGAAAGCAGGGGACCTTCGGGCCTTGCGCTATCAGATGAGCCTAGGTCGGATTAGCTAGTTGGTGAGGTAATGGCTCACCAAGGCGACGATCCGTAACTGGTCTGAGAGGATGATCAGTCACACTGGAACTGAGACACGGTCCAG	k__Bacteria; p__Proteobacteria; c__Gammaproteobacteria; o__Pseudomonadales; f__Pseudomonadaceae; g__Pseudomonas; NA	2.99252e-05	4.26174e-05	7.94571e-06	4.2219e-05	1.6629e-05	3.48323e-05
ATTGAACGCTTTCTTCCTTCCTCCCCCCTTCCCGTCTCTCTTTAGAGAGAAGCTTGCTTCTCTTGAGAGCGGCGGACGGGTGAGTAATGCCTAGGAATCTGCCTGGTAGTGGGGGATAACGTTCGGAAACGGACGCTAATACCGCATACGTCCTACGGGAGAAAGCAGGGGACCTTCGGGCCTTGCGCTATCAGATGAGCCTAGGTCGGATTAGCTAGTTGGTGAGGTAATGGCTCACCAAGGCGACGATCCGTAACTGGTCTGAGAGGATGATCAGTCACACTGGAACTGAGACACGGTCCAG	k__Bacteria; p__Proteobacteria; c__Gammaproteobacteria; o__Pseudomonadales; f__Pseudomonadaceae; g__Pseudomonas; NA	0	4.26174e-05	2.38371e-05	0	1.6629e-05	3.48323e-05
ATTGAACGCTTTCTTCCTTCCTCCCCCCTGCAAGTCGAGCGGTAGAGAGAAGCTTGCTTCTCTTGAGAGCGGCGGACGGGTGAGTAATGCCTAGGAATCTGCCTGGTAGTGGGGGATAACGTTCGGAAACGGACGCTAATACCGCATACGTCCTACGGGAGAAAGCAGGGGACCTTCGGGCCTTGCGCTATCAGATGAGCCTAGGTCGGATTAGCTAGTTGGTGAGGTAATGGCTCACCAAGGCGACGATCCGTAACTGGTCTGAGAGGATGATCAGTCACACTGGAACTGAGACACGGTCCAG	k__Bacteria; p__Proteobacteria; c__Gammaproteobacteria; o__Pseudomonadales; f__Pseudomonadaceae; g__Pseudomonas; NA	3.99002e-05	3.40939e-05	0	0	1.6629e-05	1.74161e-05
ATTGAACGCTTTCTTCCTTCCTCCCCCCTTCCCGTCGAGCGGTAGAGAGAAGCTTGCTTCTCTTGAGAGCGGCGGACGGGTGAGTAATGCCTAGGAATCTGCCTGGTAGTGGGGGATAACGTTCGGAAACGGACGCTAATACCGCATACGTCCTACGGGAGAAAGCAGGGGACCTTCGGGCCTTGCGCTATCAGATGAGCCTAGGTCGGATTAGCTAGTTGGTGAGGTAATGGCTCACCAAGGCGACGATCCGTAACTGGTCTGAGAGGATGATCAGTCACACTGGAACTGAGACACGGTCCAG	k__Bacteria; p__Proteobacteria; c__Gammaproteobacteria; o__Pseudomonadales; f__Pseudomonadaceae; g__Pseudomonas; NA	9.97506e-06	3.40939e-05	3.17829e-05	0	1.6629e-05	1.74161e-05
AGGGAACGTTGGAGGAAGGACTAACACATGCAAGTCGAGCGGTAGAGAGAAGCTTGCTTCTCTTGAGAGCGGCGGACGGGTGAGTAATGCCTAGGAATCTGCCTGGTAGTGGGGGATAACGTTCGGAAACGGACGCTAATACCGCATACGTCCTACGGGAGAAAGCAGGGGACCTTCGGGCCTTGCGCTATCAGATGAGCCTAGGTCGGATTAGCTAGTTGGTGAGGTAATGGCTCACCAAGGCGACGATCCGTAACTGGTCTGAGAGGATGATCAGTCACACTGGAACTGAGACACGGTCCAG	k__Bacteria; p__Proteobacteria; c__Gammaproteobacteria; o__Pseudomonadales; f__Pseudomonadaceae; g__Pseudomonas; NA	1.99501e-05	1.7047e-05	3.17829e-05	0	0	1.74161e-05
ATTTAACTCTTTCTTCATTCCTAACACATTCAATTCTATCTGTAGAGAGAAGCTTGCTTCTCTTGAGAGCGGCGGACGGGTGAGTAATGCCTAGGAATCTGCCTGGTAGTGGGGGATAACGTTCGGAAACGGACGCTAATACCGCATACGTCCTACGGGAGAAAGCAGGGGACCTTCGGGCCTTGCGCTATCAGATGAGCCTAGGTCGGATTAGCTAGTTGGTGAGGTAATGGCTCACCAAGGCGACGATCCGTAACTGGTCTGAGAGGATGATCAGTCACACTGGAACTGAGACACGGTCCAG	k__Bacteria; p__Proteobacteria; c__Gammaproteobacteria; o__Pseudomonadales; f__Pseudomonadaceae; g__Pseudomonas; NA	9.97506e-06	1.7047e-05	2.38371e-05	0	1.6629e-05	1.74161e-05
GGAATATTGGACAATGGGCGAAAGCCTGATCCAGCCATGCCGCGTGTGTGAAGAAGGTCTTCGGATTGTAAAGCACTTTAAGTTGGGAGGAAGGGCAGTTACCTAATACGTGATTGTTTTGACGTTACCGACAGAATAAGCACCGGCTAACTCTGTGCCAGCAGCCGCGGTAATACAGAGGGTGCAAGCGTTAATCGGAATTACTGGGCGTAAAGCGCGCGTAGGTGGTTAGTTAAGTTGGATGTGAAATCCCCGGGCTCAACCTGGGAACTGCATTCAAAACTGACTGACTAGAGTATGGTAGAGGGTGGTGGAATTTCCTGTGTAGCGGTGAAATGCGTAGATATAGGAAGGAACACCAGTGGCGAAGGCGACCACCTGGACTGATACTGACACTGA…	k__Bacteria; p__Proteobacteria; c__Gammaproteobacteria; o__Alteromonadales; f__Marinobacteraceae; g__Marinobacter; s__Marinobacter adhaerens	0	0	0	0	0	1.74161e-05
ATTGAACGCTGGCGGCAGGCCTAACACATGCAAGTCGAGCGGAGGAAAGGAGCTTGCTCCTGGAATCAGCGGCGGACGGGTGAGTAATGCCTGGGAATCTGCCTGGTAGTGGGGGATAACGTCTCGAAAGGGACGCTAATACCGCGTACGTCCTACGGGAGAAAGCAGGGGATCTTCGGACCTTGCGCTATCAGATGAGCCCAGGCCGGATTAGCTTGTTGGTGAGGTAATGGCTCACCAAGGCGACGATCCGTAGCTGGTCTGAGAGGATGATCAGCCACACTGGGACTGAGACACGGCCCAG	k__Bacteria; p__Proteobacteria; c__Gammaproteobacteria; o__Pseudomonadales; f__Pseudomonadaceae; g__Pseudomonas; s__uncultured bacterium	0	8.52348e-06	0	0	0	0
GACGAACGCTGGCGGCGTGCTTAACACATGCAAGTCGAACGGAAAGGCCCTGCTTTTGTGGGGTGCTCGAGTGGCGAACGGGTGAGTAACACGTGAGTAACCTGCCCTTGACTTTGGGATAACTTCAGGAAACTGGGGCTAATACCGGATAGGAGCTCCTGCTGCATGGTGGGGGTTGGAAAGTTTCGGCGGTTGGGGATGGACTCGCGGCTTATCAGCTTGTTGGTGGGGTAGTGGCTTACCAAGGCTTTGACGGGTAGCCGGCCTGAGATGGTGACCGGCCACATTGGGACTGAGATACGGCCCAG	k__Bacteria; p__Actinobacteria; c__Actinobacteria; o__Propionibacteriales; f__Propionibacteriaceae; g__Cutibacterium; NA	0	0	7.94571e-06	0	0	0
AACGAACGCTGGCGGCATGCCTAACACATGCAAGTCGAACGAAGTCCTTCGGGGCTTAGTGGCGCACGGGTGCGTAACGCGTGGGAATCTGCCCCTTGGTTCGGAATAACAGTTGGAAACGACTGCTAATACCGGATGATGACGTAAGTCCAAAGATTTATCGCCAAGGGATGAGCCCGCGTAGGATTAGCTAGTTGGTGGGGTAAAGGCCTACCAAGGCGACGATCCTTAGCTGGTCTGAGAGGATGATCAGCCACACTGGGACTGAGACACGGCCCAG	k__Bacteria; p__Proteobacteria; c__Alphaproteobacteria; o__Sphingomonadales; f__Sphingomonadaceae; g__Sphingomonas; NA	0	0	0	0	0	0
ATTGAACGCTGGCGGCATGCCTTACACATGCAAGTCGAACGGTAACAGGTCTTCGGATGCTGACGAGTGGCGAACGGGTGAGTAATACATCGGAACGTGCCCGATCGTGGGGGATAACGAAGCGAAAGCTTTGCTAATACCGCATACGATCTACGGATGAAAGCAGGGGACCGCAAGGCCTTGCGCGAACGGAGCGGCCGATGGCAGATTAGGTAGTTGGTGGGATAAAAGCTTACCAAGCCGACGATCTGTAGCTGGTCTGAGAGGACGACCAGCCACACTGGGAATGAGACACGGCCCAG	k__Bacteria; p__Proteobacteria; c__Gammaproteobacteria; o__Betaproteobacteriales; f__Burkholderiaceae; g__Acidovorax; NA	0	0	0	0	0	0
GACGAACGCTGGCGGTGTGCTTCACACATGCAAGTCGAACGAGGTAGCAATACCTAGTGGCGGACGGGTGAGTAACGCGTGGGAATCTGCCTTTAGATGGGGGATAACGGGCCGAAAGGTCCGCTAATACCGCATATGCCGAGAGGTGAAAGGAGTAATCCGTCTAAAGATGAGCCCGCGTCCGATTAGCTAGTTGGTAGAGTAAGAGCCTACCAAGGCGACGATCGGTAGCTGGTCTGAGAGGATGATCAGCCACAATGGGACTGAGACACGGCCCAT	k__Bacteria; p__Cyanobacteria; c__Melainabacteria; o__Obscuribacterales; Ambiguous_taxa; Ambiguous_taxa; Ambiguous_taxa	0	0	0	0	0	0
GATGAACGCTAGCGGCAGGCCTAATACATGCAAGTCGAACGGTCAGTAGCAATATTGATAGTGGCGCACGGGTGCGTAACACGTAACTAACCTACCTACAACTGGGGGATAGCCCGCCGAAAGGCGGATTAATACCGCATAAGGCATGCGCCCGGCATCGGGTGTTTGTTAAAGATTTATTGGTTGTAGATGGAGTTGCGGGTCATTAGCTAGTTGGTTGGGTAATGGCTGACCAAGGCGACGATGACTAGGGGAGCTGAGAGGCTGGTCCCCCACACGGGCACTGAGATACGGGCCCG	k__Bacteria; p__Bacteroidetes; c__Bacteroidia; o__Cytophagales; f__Hymenobacteraceae; g__Hymenobacter; s__uncultured bacterium	0	0	0	0	0	0
GATGAACGCTGGCGGCGTGCTTAACACATGCAAGTCGAACGATGAAGCCAGCTTGCTGGTGGATTAGTGGCGAACGGGTGAGTAACACGTGAGTAACCTGCCCTTGACTCTGGGATAAGCCTGGGAAACCGGGTCTAATACTGGATACGACCTTCCCACGCATGTGGTGTTGGTGGAAAGCTTTTGTGGTTTTGGATGGACTCGCGGCCTATCAGCTTGTTGGTGGGGTAATGGCCTACCAAGGCGACGACGGGTAGCCGGCCTGAGAGGGTGACCGGCCACACTGGGACTGAGACACGGCCCAG	k__Bacteria; p__Actinobacteria; c__Actinobacteria; o__Micrococcales; f__Micrococcaceae; g__Arthrobacter; Ambiguous_taxa	0	0	0	0	0	0
