# Supplementary material for: Differential response of digesta- and mucosa-associated intestinal microbiota to dietary insect meal during the seawater phase of Atlantic salmon
Source: Anim Microbiome. 2021 Jan 7;3:8. doi: 10.1186/s42523-020-00071-3 (PMC7934271; doi:10.1186/s42523-020-00071-3)
Supplement: Supplementary file 3 — Additional file 3: Table S2. The prevalence of core ASVs in different sample types. [file 42523_2020_71_MOESM3_ESM.xlsx]

## Sheet: Table S2
Table S2. The prevalence of core ASVs in different sample types.
Taxonomy							Prevalence
Phylum	Class	Order	Family	Genus	Species		REF-DID	REF-DIM	IM-DID	IM-DIM
Spirochaetes	Spirochaetia	Brevinematales	Brevinemataceae	Brevinema	Brevinema andersonii		1	1	1	1
Tenericutes	Mollicutes	Mycoplasmatales	Mycoplasmataceae	Mycoplasma			1	0.944	1	1
Proteobacteria	Gammaproteobacteria	Vibrionales	Vibrionaceae	Aliivibrio			0.889	0.944	1	0.889
Spirochaetes	Spirochaetia	Spirochaetales	Spirochaetaceae				0.778	0.833	0.944	0.889
Tenericutes	Mollicutes	Mycoplasmatales	Mycoplasmataceae	Mycoplasma			0.944	0.611	0.944	0.722
Proteobacteria	Gammaproteobacteria	Vibrionales	Vibrionaceae	Photobacterium			1	0.556	0.944	0.722
Firmicutes	Bacilli	Lactobacillales					0.667	0.5	1	1
Actinobacteria	Actinobacteria	Corynebacteriales	Corynebacteriaceae	Corynebacterium 1			0.667	0.167	1	1
Spirochaetes	Spirochaetia	Brevinematales	Brevinemataceae	Brevinema	Brevinema andersonii		0.667	0.833	0.444	0.889
Tenericutes	Mollicutes	Mycoplasmatales	Mycoplasmataceae	Mycoplasma			0.889	0.444	0.944	0.5
Spirochaetes	Spirochaetia	Brevinematales	Brevinemataceae	Brevinema	Brevinema andersonii		0.722	0.889	0.444	0.722
Proteobacteria	Gammaproteobacteria	Vibrionales	Vibrionaceae	Photobacterium			1	0.278	0.833	0.667
Actinobacteria	Actinobacteria	Micrococcales	Brevibacteriaceae	Brevibacterium			0.778	0.167	1	0.722
Firmicutes	Bacilli	Lactobacillales	Leuconostocaceae	Weissella			1	0.222	1	0.278
Actinobacteria	Actinobacteria	Corynebacteriales	Corynebacteriaceae	Corynebacterium 1	Corynebacterium aurimucosum ATCC 700975		0.333	0.167	1	0.833
RsaHF231							0.333	0.111	1	0.778
Actinobacteria	Actinobacteria	Actinomycetales	Actinomycetaceae	Actinomyces			0.167	0.111	1	0.889
Actinobacteria	Actinobacteria	Actinomycetales	Actinomycetaceae	Actinomyces			0.222	0.111	1	0.778
Proteobacteria	Gammaproteobacteria	Vibrionales	Vibrionaceae	Photobacterium			0.889	0.167	0.889	0.167
Actinobacteria	Actinobacteria	Corynebacteriales	Corynebacteriaceae	Corynebacterium 1			0.278	0.056	1	0.722
Actinobacteria	Actinobacteria	Corynebacteriales	Corynebacteriaceae	Corynebacterium 1			0.278	0	1	0.778
Firmicutes	Bacilli	Lactobacillales	Streptococcaceae	Streptococcus			0.889	0	1	0.167
Firmicutes	Bacilli	Bacillales	Bacillaceae	Geobacillus	Parageobacillus toebii		0.944	0.056	0.944	0.056
RsaHF231							0.111	0	1	0.889
Actinobacteria	Actinobacteria	Micrococcales	Beutenbergiaceae				0.111	0.167	1	0.667
Firmicutes	Bacilli	Lactobacillales	Lactobacillaceae	Lactobacillus			0.889	0.167	0.889	0
Firmicutes	Bacilli	Lactobacillales	Lactobacillaceae	Lactobacillus			0.944	0	1	0
Firmicutes	Bacilli	Bacillales	Bacillaceae	Oceanobacillus			0.389	0.111	1	0.444
Proteobacteria	Gammaproteobacteria	Vibrionales	Vibrionaceae	Photobacterium			0.944	0.056	0.667	0.278
Actinobacteria	Actinobacteria	Micrococcales	Microbacteriaceae	Microbacterium			0.167	0.056	1	0.611
Firmicutes	Bacilli	Bacillales	Bacillaceae	Oceanobacillus	Oceanobacillus caeni		0.167	0.056	1	0.611
Firmicutes	Bacilli	Bacillales	Bacillaceae	Geobacillus	Parageobacillus toebii		0.778	0	1	0.056
RsaHF231							0.111	0.056	1	0.667
Actinobacteria	Actinobacteria	Corynebacteriales	Corynebacteriaceae	Corynebacterium 1	Corynebacterium aurimucosum ATCC 700975		0.111	0	1	0.667
Firmicutes	Bacilli	Lactobacillales	Leuconostocaceae	Leuconostoc			0.722	0.056	1	0
Firmicutes	Bacilli	Bacillales	Bacillaceae	Oceanobacillus	Oceanobacillus caeni		0.222	0.056	1	0.5
Firmicutes	Bacilli	Lactobacillales	Lactobacillaceae	Lactobacillus			0.833	0.056	0.833	0
Firmicutes	Bacilli	Bacillales	Bacillaceae	Bacillus			0.278	0.056	1	0.389
Firmicutes	Bacilli	Lactobacillales	Enterococcaceae				0.167	0	1	0.5
Firmicutes	Bacilli	Lactobacillales	Leuconostocaceae	Leuconostoc			0.611	0.056	0.944	0.056
Firmicutes	Bacilli	Bacillales	Bacillaceae	Oceanobacillus	Oceanobacillus caeni		0.167	0.056	1	0.444
Actinobacteria	Actinobacteria	Corynebacteriales	Corynebacteriaceae				0.389	0.056	1	0.167
Firmicutes	Bacilli	Lactobacillales					0.111	0.056	1	0.444
Firmicutes	Bacilli	Lactobacillales	Leuconostocaceae	Weissella			0.611	0	0.944	0.056
Firmicutes	Bacilli	Lactobacillales	Leuconostocaceae	Leuconostoc			0.611	0.056	0.944	0
Actinobacteria	Actinobacteria	Micrococcales	Microbacteriaceae	Microbacterium			0.056	0	1	0.5
Actinobacteria	Actinobacteria	Corynebacteriales	Corynebacteriaceae	Corynebacterium 1			0.056	0	1	0.5
Firmicutes	Bacilli	Lactobacillales	Enterococcaceae				0.111	0	1	0.444
Firmicutes	Bacilli	Bacillales	Staphylococcaceae	Macrococcus			0.5	0	1	0.056
Firmicutes	Bacilli	Bacillales	Bacillaceae	Bacillus			0.444	0	1	0.111
Actinobacteria	Actinobacteria	Corynebacteriales	Corynebacteriaceae	Corynebacterium 1			0.056	0	1	0.444
Actinobacteria	Actinobacteria	Actinomycetales	Actinomycetaceae	Actinomyces			0.167	0	1	0.333
Actinobacteria	Actinobacteria	Actinomycetales	Actinomycetaceae	Actinomyces			0	0	1	0.5
Firmicutes	Bacilli	Lactobacillales	Lactobacillaceae	Lactobacillus	Lactobacillus sp. DJF_WC57		0.5	0	0.944	0.056
Firmicutes	Bacilli	Lactobacillales	Streptococcaceae	Streptococcus	Streptococcus sobrinus		0.556	0	0.944	0
Firmicutes	Bacilli	Bacillales	Bacillaceae	Ureibacillus			0.889	0	0.611	0
Firmicutes	Bacilli	Bacillales	Bacillaceae				0.111	0	1	0.389
Firmicutes	Bacilli	Bacillales	Bacillaceae	Ornithinibacillus			0.167	0.056	1	0.278
Firmicutes	Bacilli	Bacillales	Staphylococcaceae	Staphylococcus	Staphylococcus sciuri		0.389	0	1	0.111
Firmicutes	Bacilli	Lactobacillales	Lactobacillaceae	Lactobacillus	Lactobacillus aviarius		0.833	0	0.611	0
Firmicutes	Bacilli	Lactobacillales	Enterococcaceae	Enterococcus			0.056	0.111	1	0.278
Firmicutes	Bacilli	Bacillales	Bacillaceae	Oceanobacillus			0.111	0.056	1	0.278
Firmicutes	Bacilli	Bacillales	Bacillaceae	Oceanobacillus			0.167	0	1	0.278
Firmicutes	Bacilli	Bacillales	Staphylococcaceae	Staphylococcus	Staphylococcus sciuri		0.222	0	1	0.222
Firmicutes	Bacilli	Bacillales	Bacillaceae	Bacillus	Bacillus thermoamylovorans		0.444	0	0.944	0.056
Firmicutes	Bacilli	Bacillales	Bacillaceae	Bacillus	Bacillus thermoamylovorans		0.444	0	1	0
Firmicutes	Bacilli	Bacillales	Bacillaceae	Bacillus			0.167	0.056	1	0.222
Firmicutes	Bacilli	Bacillales	Bacillaceae	Bacillus			0.056	0.056	1	0.333
Actinobacteria	Actinobacteria	Micrococcales	Dermabacteraceae	Brachybacterium	Brachybacterium paraconglomeratum		0.333	0.056	1	0
Actinobacteria	Actinobacteria	Micrococcales	Brevibacteriaceae	Brevibacterium			0.278	0.056	1	0.056
Firmicutes	Clostridia	Clostridiales	Lachnospiraceae				0.056	0	1	0.333
Firmicutes	Bacilli	Lactobacillales	Aerococcaceae	Globicatella			0.333	0	0.944	0.111
Firmicutes	Bacilli	Bacillales	Bacillaceae	Oceanobacillus			0	0	1	0.389
Firmicutes	Bacilli	Bacillales	Bacillaceae				0.056	0	1	0.333
Firmicutes	Bacilli	Bacillales	Planococcaceae	Lysinibacillus			0.111	0	1	0.278
Actinobacteria	Actinobacteria	Corynebacteriales	Corynebacteriaceae	Corynebacterium 1			0.333	0	1	0
Firmicutes	Bacilli	Lactobacillales	Enterococcaceae	Enterococcus			0.167	0	1	0.167
Firmicutes	Bacilli	Lactobacillales	Enterococcaceae	Enterococcus			0.056	0.056	1	0.222
Firmicutes	Bacilli	Lactobacillales	Enterococcaceae	Enterococcus			0.056	0.056	1	0.222
Firmicutes	Bacilli	Bacillales	Bacillaceae				0.056	0	1	0.278
Firmicutes	Bacilli	Bacillales	Planococcaceae	Kurthia			0.278	0.111	0.889	0.056
Firmicutes	Bacilli	Bacillales	Bacillaceae	Bacillus			0.056	0	1	0.278
Proteobacteria	Gammaproteobacteria	Pseudomonadales	Pseudomonadaceae	Pseudomonas			0.167	0.111	1	0.056
Actinobacteria	Actinobacteria	Corynebacteriales	Corynebacteriaceae	Corynebacterium 1			0.111	0	1	0.167
Firmicutes	Bacilli	Lactobacillales	Enterococcaceae	Enterococcus			0.167	0	1	0.111
Firmicutes	Bacilli	Bacillales	Bacillaceae	Oceanobacillus			0.056	0	1	0.222
Firmicutes	Bacilli	Bacillales	Bacillaceae	Oceanobacillus			0	0.056	1	0.222
Firmicutes	Clostridia	Clostridiales	Family XI	Tepidimicrobium	Tepidimicrobium sp. GRC1		0.889	0.167	0.111	0.111
Actinobacteria	Actinobacteria	Corynebacteriales	Corynebacteriaceae	Corynebacterium 1			0.056	0	1	0.167
Actinobacteria	Actinobacteria	Micrococcales	Brevibacteriaceae	Brevibacterium	Brevibacterium album		0	0.056	1	0.167
Firmicutes	Bacilli	Lactobacillales	Aerococcaceae	Globicatella			0.222	0	1	0
Firmicutes	Bacilli	Lactobacillales	Enterococcaceae	Enterococcus			0.056	0	1	0.167
Firmicutes	Bacilli	Lactobacillales					0	0	0.944	0.278
Firmicutes	Bacilli	Bacillales	Bacillaceae	Oceanobacillus			0	0.056	1	0.167
Firmicutes	Bacilli	Bacillales	Bacillaceae	Ornithinibacillus			0.111	0	1	0.111
Firmicutes	Bacilli	Bacillales	Bacillaceae	Oceanobacillus			0	0	1	0.222
Firmicutes	Bacilli	Bacillales	Bacillaceae	Bacillus			0.111	0.056	1	0.056
Firmicutes	Bacilli	Bacillales	Bacillaceae	Bacillus			0	0	1	0.222
Firmicutes	Bacilli	Bacillales	Planococcaceae	Kurthia	Kurthia sp. PAOGL173		0.167	0	1	0.056
Bacteroidetes	Bacteroidia	Flavobacteriales	Flavobacteriaceae	Flavobacterium			0	0.056	1	0.167
Firmicutes	Clostridia	Clostridiales	Clostridiaceae 1	Clostridium sensu stricto 7			0.889	0.056	0.222	0.056
Actinobacteria	Actinobacteria	Micrococcales	Microbacteriaceae	Leucobacter			0.056	0	1	0.111
Actinobacteria	Actinobacteria	Micrococcales	Microbacteriaceae	Microbacterium			0	0	1	0.167
Actinobacteria	Actinobacteria	Corynebacteriales	Nocardiaceae	Gordonia			0.111	0	1	0.056
Actinobacteria	Actinobacteria	Corynebacteriales	Corynebacteriaceae	Corynebacterium 1			0.056	0	1	0.111
Firmicutes	Clostridia	Clostridiales	Lachnospiraceae				0.056	0	1	0.111
Firmicutes	Bacilli	Lactobacillales	Enterococcaceae	Enterococcus			0.056	0	1	0.111
Firmicutes	Bacilli	Lactobacillales	Enterococcaceae				0.056	0	1	0.111
Firmicutes	Bacilli	Lactobacillales	Lactobacillaceae	Lactobacillus	Lactobacillus rhamnosus		0.167	0	1	0
Firmicutes	Bacilli	Lactobacillales	Lactobacillaceae	Lactobacillus			0.056	0	1	0.111
Firmicutes	Bacilli	Bacillales	Bacillaceae	Anoxybacillus			0	0	1	0.167
Firmicutes	Bacilli	Bacillales	Bacillaceae	Oceanobacillus	Oceanobacillus caeni		0	0	1	0.167
Firmicutes	Bacilli	Bacillales	Bacillaceae	Oceanobacillus	Oceanobacillus caeni		0.056	0	1	0.111
Firmicutes	Bacilli	Bacillales	Bacillaceae	Oceanobacillus			0	0.056	1	0.111
Firmicutes	Bacilli	Bacillales	Bacillaceae	Bacillus			0	0	1	0.167
Firmicutes	Bacilli	Bacillales	Bacillaceae	Bacillus	Bacillus andreraoultii		0.056	0	1	0.111
Firmicutes	Bacilli	Bacillales	Planococcaceae	Lysinibacillus			0	0	1	0.167
Actinobacteria	Actinobacteria	Corynebacteriales	Corynebacteriaceae	Corynebacterium 1			0.222	0	0.944	0
Firmicutes	Bacilli	Lactobacillales	Lactobacillaceae	Lactobacillus	Lactobacillus salivarius		0.222	0	0.944	0
Firmicutes	Clostridia	Clostridiales	Clostridiaceae 1	Clostridium sensu stricto 7			0.889	0	0.278	0
Actinobacteria	Actinobacteria	Micrococcales	Microbacteriaceae	Leucobacter			0	0	1	0.111
Actinobacteria	Actinobacteria	Micrococcales	Microbacteriaceae	Leucobacter			0	0	0.944	0.167
Actinobacteria	Actinobacteria	Corynebacteriales	Corynebacteriaceae	Corynebacterium 1			0	0	0.944	0.167
Actinobacteria	Actinobacteria	Corynebacteriales	Corynebacteriaceae	Corynebacterium 1			0	0	1	0.111
Actinobacteria	Actinobacteria	Corynebacteriales	Corynebacteriaceae	Corynebacterium 1	Corynebacterium xerosis		0	0	1	0.111
Actinobacteria	Actinobacteria	Micrococcales	Brevibacteriaceae	Brevibacterium			0	0	1	0.111
Actinobacteria	Actinobacteria	Micrococcales	Promicromonosporaceae	Cellulosimicrobium			0	0	1	0.111
Actinobacteria	Actinobacteria	Micrococcales	Brevibacteriaceae	Brevibacterium			0	0	1	0.111
Actinobacteria	Actinobacteria	Actinomycetales	Actinomycetaceae	Actinomyces			0	0	1	0.111
Firmicutes	Erysipelotrichia	Erysipelotrichales	Erysipelotrichaceae	Erysipelatoclostridium			0.056	0	1	0.056
Firmicutes	Clostridia	Clostridiales	Lachnospiraceae				0.056	0	1	0.056
Firmicutes	Bacilli	Lactobacillales	Enterococcaceae				0	0	1	0.111
Firmicutes	Bacilli	Lactobacillales	Enterococcaceae	Enterococcus			0	0	0.944	0.167
Firmicutes	Bacilli	Lactobacillales	Enterococcaceae	Enterococcus			0	0	1	0.111
Firmicutes	Bacilli	Lactobacillales	Enterococcaceae	Enterococcus			0	0	1	0.111
Firmicutes	Bacilli	Lactobacillales	Enterococcaceae	Enterococcus	Enterococcus faecalis		0.056	0.056	0.944	0.056
Firmicutes	Bacilli	Lactobacillales	Enterococcaceae				0	0	1	0.111
Firmicutes	Bacilli	Lactobacillales	Lactobacillaceae	Lactobacillus			0	0.056	0.889	0.167
Firmicutes	Bacilli	Bacillales	Bacillaceae	Anoxybacillus			0	0	1	0.111
Firmicutes	Bacilli	Bacillales	Bacillaceae	Gracilibacillus			0	0	1	0.111
Firmicutes	Bacilli	Bacillales	Bacillaceae	Oceanobacillus	Oceanobacillus sojae		0	0	1	0.111
Firmicutes	Bacilli	Bacillales	Bacillaceae	Oceanobacillus	Oceanobacillus caeni		0.056	0	1	0.056
Firmicutes	Bacilli	Bacillales	Bacillaceae				0	0.056	1	0.056
Firmicutes	Bacilli	Bacillales	Bacillaceae	Ornithinibacillus			0	0.056	1	0.056
Firmicutes	Bacilli	Bacillales	Bacillaceae	Bacillus			0.111	0	1	0
Firmicutes	Bacilli	Bacillales	Bacillaceae	Bacillus			0.056	0	1	0.056
Firmicutes	Bacilli	Bacillales	Bacillaceae	Bacillus			0	0	1	0.111
Proteobacteria	Gammaproteobacteria	Enterobacteriales	Enterobacteriaceae	Escherichia-Shigella			0.222	0	0.833	0.056
Proteobacteria	Gammaproteobacteria	Enterobacteriales	Enterobacteriaceae	Proteus	Proteus mirabilis		0.056	0.056	1	0
Actinobacteria	Actinobacteria	Micrococcales	Microbacteriaceae	Leucobacter			0	0	1	0.056
Actinobacteria	Actinobacteria	Micrococcales	Microbacteriaceae	Leucobacter			0	0	1	0.056
Actinobacteria	Actinobacteria	Micrococcales	Microbacteriaceae	Microbacterium			0	0	0.944	0.111
Actinobacteria	Actinobacteria	Micrococcales	Micrococcaceae	Glutamicibacter			0	0	0.944	0.111
Actinobacteria	Actinobacteria	Corynebacteriales	Corynebacteriaceae	Corynebacterium 1			0.056	0	1	0
Actinobacteria	Actinobacteria	Corynebacteriales	Corynebacteriaceae	Corynebacterium 1			0	0	1	0.056
Actinobacteria	Actinobacteria	Corynebacteriales	Corynebacteriaceae	Corynebacterium 1			0.056	0	0.944	0.056
Actinobacteria	Actinobacteria	Corynebacteriales	Corynebacteriaceae	Corynebacterium 1			0	0	1	0.056
Actinobacteria	Actinobacteria	Corynebacteriales	Corynebacteriaceae	Corynebacterium 1	Corynebacterium xerosis		0	0	1	0.056
Actinobacteria	Actinobacteria	Corynebacteriales	Dietziaceae	Dietzia			0.056	0	1	0
Actinobacteria	Actinobacteria	Micrococcales	Brevibacteriaceae	Brevibacterium			0	0	1	0.056
Actinobacteria	Actinobacteria	Micrococcales	Promicromonosporaceae	Cellulosimicrobium			0	0	1	0.056
Actinobacteria	Actinobacteria	Micrococcales	Brevibacteriaceae	Brevibacterium			0	0	1	0.056
Bacteroidetes	Bacteroidia	Sphingobacteriales	Sphingobacteriaceae	Sphingobacterium			0	0	0.944	0.111
Firmicutes	Clostridia	Clostridiales	Peptostreptococcaceae	Paraclostridium			0.056	0	1	0
Firmicutes	Bacilli	Lactobacillales	Enterococcaceae	Enterococcus			0	0	1	0.056
Firmicutes	Bacilli	Lactobacillales	Enterococcaceae	Enterococcus			0.056	0	1	0
Firmicutes	Bacilli	Lactobacillales	Enterococcaceae	Enterococcus	Enterococcus faecium		0.056	0	0.944	0.056
Firmicutes	Bacilli	Lactobacillales	Lactobacillaceae	Lactobacillus			0	0	1	0.056
Firmicutes	Bacilli	Lactobacillales	Lactobacillaceae	Lactobacillus			0	0	1	0.056
Firmicutes	Bacilli	Bacillales	Paenibacillaceae	Paenibacillus	Paenibacillus sp. YT0039		0.056	0	1	0
Firmicutes	Bacilli	Bacillales	Planococcaceae				0.167	0	0.889	0
Firmicutes	Bacilli	Bacillales	Bacillaceae	Gracilibacillus			0	0	1	0.056
Firmicutes	Bacilli	Bacillales	Bacillaceae	Gracilibacillus			0.056	0	1	0
Firmicutes	Bacilli	Bacillales	Bacillaceae				0	0	1	0.056
Firmicutes	Bacilli	Bacillales	Bacillaceae	Oceanobacillus			0	0	1	0.056
Firmicutes	Bacilli	Bacillales	Bacillaceae	Oceanobacillus			0	0	1	0.056
Firmicutes	Bacilli	Bacillales	Bacillaceae	Bacillus			0	0	0.944	0.111
Firmicutes	Bacilli	Bacillales	Bacillaceae	Bacillus			0.056	0	1	0
Firmicutes	Bacilli	Bacillales	Bacillaceae	Bacillus			0	0.056	1	0
Firmicutes	Bacilli	Bacillales	Bacillaceae	Bacillus	Bacillus circulans		0.056	0	1	0
Firmicutes	Bacilli	Bacillales	Bacillaceae	Bacillus			0	0	1	0.056
Firmicutes	Bacilli	Bacillales	Bacillaceae	Bacillus			0.056	0	1	0
Firmicutes	Bacilli	Bacillales	Bacillaceae	Bacillus			0.056	0.056	0.944	0
Firmicutes	Bacilli	Bacillales	Bacillaceae	Bacillus			0	0	1	0.056
Firmicutes	Bacilli	Bacillales	Bacillaceae	Bacillus	Bacillus niameyensis		0	0	1	0.056
Firmicutes	Bacilli	Bacillales	Planococcaceae	Lysinibacillus			0.056	0	1	0
Firmicutes	Bacilli	Bacillales	Planococcaceae	Lysinibacillus			0	0	1	0.056
Firmicutes	Bacilli	Lactobacillales	Enterococcaceae	Enterococcus	Enterococcus diestrammenae		0	0	0.944	0.111
Firmicutes	Bacilli	Lactobacillales	Enterococcaceae	Enterococcus	Enterococcus diestrammenae		0	0	1	0.056
Bacteroidetes	Bacteroidia	Flavobacteriales	Flavobacteriaceae	Flavobacterium			0	0	1	0.056
Proteobacteria	Gammaproteobacteria	Xanthomonadales	Xanthomonadaceae	Lysobacter			0	0	0.889	0.167
Proteobacteria	Gammaproteobacteria	Enterobacteriales	Enterobacteriaceae	Morganella			0	0	0.944	0.111
Proteobacteria	Gammaproteobacteria	Enterobacteriales	Enterobacteriaceae	Morganella			0	0	1	0.056
Proteobacteria	Gammaproteobacteria	Betaproteobacteriales	Burkholderiaceae	Comamonas			0.056	0	0.944	0
Proteobacteria	Alphaproteobacteria	Rhodobacterales	Rhodobacteraceae	Paracoccus			0	0	0.944	0.056
Actinobacteria	Actinobacteria	Micrococcales	Dermabacteraceae	Brachybacterium	Brachybacterium paraconglomeratum		0.056	0	0.944	0
Actinobacteria	Actinobacteria	Micrococcales	Microbacteriaceae	Leucobacter			0	0	1	0
Actinobacteria	Actinobacteria	Micrococcales	Microbacteriaceae				0	0	0.944	0.056
Actinobacteria	Actinobacteria	Corynebacteriales	Dietziaceae	Dietzia			0	0	1	0
Actinobacteria	Actinobacteria	Corynebacteriales	Nocardiaceae	Rhodococcus			0	0	1	0
Actinobacteria	Actinobacteria	Corynebacteriales	Nocardiaceae	Gordonia			0	0	0.944	0.056
Actinobacteria	Actinobacteria	Corynebacteriales	Corynebacteriaceae				0.056	0	0.944	0
Actinobacteria	Actinobacteria	Corynebacteriales	Corynebacteriaceae	Corynebacterium 1			0	0	0.944	0.056
Bacteroidetes	Bacteroidia	Sphingobacteriales	Sphingobacteriaceae				0	0	1	0
Bacteroidetes	Bacteroidia	Sphingobacteriales	Sphingobacteriaceae	Sphingobacterium			0	0	1	0
Firmicutes	Bacilli	Lactobacillales	Enterococcaceae	Enterococcus	Enterococcus gallinarum		0	0	1	0
Firmicutes	Bacilli	Lactobacillales	Enterococcaceae				0	0	1	0
Firmicutes	Bacilli	Lactobacillales	Enterococcaceae	Enterococcus			0.056	0	0.944	0
Firmicutes	Bacilli	Lactobacillales	Enterococcaceae	Tetragenococcus			0	0	0.944	0.056
Firmicutes	Bacilli	Lactobacillales	Enterococcaceae				0	0	1	0
Firmicutes	Bacilli	Lactobacillales	Lactobacillaceae	Lactobacillus			0	0	1	0
Firmicutes	Bacilli	Lactobacillales	Lactobacillaceae	Lactobacillus			0	0	0.944	0.056
Firmicutes	Bacilli	Lactobacillales	Lactobacillaceae	Lactobacillus			0	0	1	0
Firmicutes	Bacilli	Lactobacillales	Lactobacillaceae	Lactobacillus			0	0	0.944	0.056
Firmicutes	Bacilli	Lactobacillales	Leuconostocaceae	Weissella	Weissella paramesenteroides		0	0	0.944	0.056
Firmicutes	Bacilli	Bacillales					0	0	1	0
Firmicutes	Bacilli	Bacillales	Bacillaceae	Anoxybacillus			0	0	1	0
Firmicutes	Bacilli	Bacillales	Bacillaceae				0	0	0.944	0.056
Firmicutes	Bacilli	Bacillales	Bacillaceae	Oceanobacillus			0	0	0.944	0.056
Firmicutes	Bacilli	Bacillales	Bacillaceae	Ornithinibacillus			0	0	0.944	0.056
Firmicutes	Bacilli	Bacillales	Bacillaceae	Ornithinibacillus			0	0	1	0
Firmicutes	Bacilli	Bacillales	Bacillaceae	Oceanobacillus			0	0	1	0
Firmicutes	Bacilli	Bacillales	Staphylococcaceae	Staphylococcus	Staphylococcus condimenti		0	0	0.944	0.056
Firmicutes	Bacilli	Bacillales	Bacillaceae	Bacillus	Bacillus thermoamylovorans		0.167	0	0.833	0
Firmicutes	Bacilli	Bacillales	Bacillaceae	Bacillus			0	0	1	0
Firmicutes	Bacilli	Bacillales	Bacillaceae	Bacillus			0	0	1	0
Firmicutes	Bacilli	Bacillales	Bacillaceae	Bacillus			0	0	1	0
Firmicutes	Bacilli	Bacillales	Bacillaceae	Bacillus			0	0	1	0
Firmicutes	Bacilli	Bacillales	Bacillaceae	Bacillus			0	0	1	0
Firmicutes	Bacilli	Bacillales	Bacillaceae	Bacillus	Bacillus acidicola		0	0	1	0
Firmicutes	Bacilli	Bacillales	Bacillaceae	Bacillus	Bacillus acidicola		0.056	0	0.944	0
Firmicutes	Bacilli	Bacillales	Bacillaceae	Bacillus			0	0	1	0
Firmicutes	Bacilli	Bacillales	Bacillaceae	Bacillus			0	0	1	0
Firmicutes	Bacilli	Bacillales	Bacillaceae	Bacillus			0	0	1	0
Firmicutes	Bacilli	Bacillales	Bacillaceae	Bacillus			0	0	1	0
Firmicutes	Bacilli	Bacillales	Bacillaceae	Bacillus			0	0	1	0
Firmicutes	Bacilli	Bacillales	Bacillaceae	Bacillus			0	0	1	0
Firmicutes	Bacilli	Bacillales	Bacillaceae	Bacillus	Bacillus sp. MH101		0	0	1	0
Firmicutes	Bacilli	Bacillales	Bacillaceae	Bacillus	Bacillus sp. MH602		0	0	1	0
Firmicutes	Bacilli	Bacillales	Planococcaceae	Viridibacillus			0	0	0.944	0.056
Firmicutes	Bacilli	Bacillales	Planococcaceae	Lysinibacillus			0	0	1	0
Firmicutes	Bacilli	Bacillales	Planococcaceae	Lysinibacillus			0	0	1	0
Firmicutes	Bacilli	Bacillales	Planococcaceae	Lysinibacillus			0.056	0	0.889	0.056
Firmicutes	Clostridia	Clostridiales	Clostridiaceae 1	Clostridium sensu stricto 7			0.833	0	0.167	0
Proteobacteria	Gammaproteobacteria	Xanthomonadales	Xanthomonadaceae	Lysobacter			0	0	1	0
Proteobacteria	Gammaproteobacteria	Enterobacteriales	Enterobacteriaceae				0	0	1	0
Proteobacteria	Gammaproteobacteria	Enterobacteriales	Enterobacteriaceae	Morganella	Morganella morganii subsp. morganii		0.056	0	0.944	0
Actinobacteria	Actinobacteria	Micrococcales	Microbacteriaceae	Leucobacter			0.111	0	0.833	0
Actinobacteria	Actinobacteria	Micrococcales	Microbacteriaceae	Leucobacter			0	0	0.944	0
Actinobacteria	Actinobacteria	Micrococcales	Microbacteriaceae	Microbacterium	Microbacterium sp. EG69		0	0	0.944	0
Actinobacteria	Actinobacteria	Corynebacteriales	Corynebacteriaceae	Corynebacterium 1			0	0	0.944	0
Actinobacteria	Actinobacteria	Micrococcales	Brevibacteriaceae	Brevibacterium			0	0	0.889	0.056
Bacteroidetes	Bacteroidia	Sphingobacteriales	Sphingobacteriaceae	Sphingobacterium	Sphingobacterium gobiense		0	0	0.889	0.056
Bacteroidetes	Bacteroidia	Sphingobacteriales	Sphingobacteriaceae				0	0	0.944	0
Bacteroidetes	Bacteroidia	Sphingobacteriales	Sphingobacteriaceae	Sphingobacterium			0	0	0.889	0.056
Firmicutes	Clostridia	Clostridiales	Lachnospiraceae				0	0	0.889	0.056
Bacteroidetes	Bacteroidia	Bacteroidales	Bacteroidaceae	Bacteroides	Bacteroides thetaiotaomicron		0	0	0.944	0
Firmicutes	Clostridia	Clostridiales	Lachnospiraceae	Natranaerovirga			0	0	0.944	0
Firmicutes	Clostridia	Clostridiales	Peptostreptococcaceae	Peptostreptococcus			0.833	0.056	0.056	0
Firmicutes	Bacilli	Lactobacillales	Carnobacteriaceae	Atopostipes			0.056	0	0.889	0
Firmicutes	Bacilli	Lactobacillales	Enterococcaceae	Enterococcus			0	0	0.944	0
Firmicutes	Bacilli	Lactobacillales	Enterococcaceae	Enterococcus			0	0	0.889	0.056
Firmicutes	Bacilli	Lactobacillales	Enterococcaceae	Enterococcus			0	0	0.944	0
Firmicutes	Bacilli	Lactobacillales	Enterococcaceae	Enterococcus			0	0	0.889	0.056
Firmicutes	Bacilli	Lactobacillales	Enterococcaceae	Enterococcus	Enterococcus faecium		0	0	0.944	0
Firmicutes	Bacilli	Lactobacillales	Lactobacillaceae	Lactobacillus	Lactobacillus sp. 123B		0	0	0.944	0
Firmicutes	Bacilli	Lactobacillales	Lactobacillaceae	Lactobacillus	Lactobacillus paralimentarius		0	0	0.944	0
Firmicutes	Bacilli	Bacillales	Paenibacillaceae	Ammoniphilus			0	0	0.944	0
Firmicutes	Bacilli	Bacillales	Paenibacillaceae				0	0	0.944	0
Firmicutes	Bacilli	Bacillales	Bacillaceae	Bacillus			0	0	0.889	0.056
Firmicutes	Bacilli	Bacillales	Bacillaceae	Bacillus			0	0	0.889	0.056
Firmicutes	Bacilli	Bacillales	Planococcaceae	Savagea			0	0	0.889	0.056
Firmicutes	Bacilli	Bacillales	Bacillaceae	Gracilibacillus			0	0	0.889	0.056
Firmicutes	Bacilli	Bacillales	Bacillaceae	Oceanobacillus			0	0	0.944	0
Firmicutes	Bacilli	Bacillales	Bacillaceae	Oceanobacillus			0	0	0.944	0
Firmicutes	Bacilli	Bacillales	Bacillaceae	Oceanobacillus	Oceanobacillus caeni		0.056	0	0.889	0
Firmicutes	Bacilli	Bacillales	Bacillaceae	Ornithinibacillus			0	0	0.944	0
Firmicutes	Bacilli	Bacillales	Bacillaceae	Bacillus			0	0	0.944	0
Firmicutes	Bacilli	Bacillales	Bacillaceae	Bacillus			0	0	0.944	0
Firmicutes	Bacilli	Bacillales	Bacillaceae	Bacillus			0	0	0.944	0
Firmicutes	Bacilli	Bacillales	Bacillaceae	Bacillus	Bacillus andreraoultii		0	0	0.944	0
Firmicutes	Bacilli	Bacillales	Bacillaceae	Bacillus			0	0	0.944	0
Firmicutes	Bacilli	Bacillales	Bacillaceae	Bacillus			0	0	0.944	0
Firmicutes	Bacilli	Bacillales	Bacillaceae	Bacillus			0	0	0.944	0
Firmicutes	Bacilli	Bacillales	Bacillaceae	Bacillus	Bacillus niameyensis		0	0	0.944	0
RsaHF231							0	0	0.889	0.056
Proteobacteria	Gammaproteobacteria	Enterobacteriales	Enterobacteriaceae	Providencia			0	0	0.944	0
Actinobacteria	Actinobacteria	Actinomycetales	Actinomycetaceae	Actinomyces			0	0	0.833	0.056
Firmicutes	Bacilli	Lactobacillales	Enterococcaceae	Enterococcus			0	0	0.833	0.056
Firmicutes	Bacilli	Lactobacillales	Leuconostocaceae	Weissella	Weissella paramesenteroides		0	0	0.833	0.056
Firmicutes	Bacilli	Bacillales	Bacillaceae				0	0	0.833	0.056
Firmicutes	Bacilli	Bacillales	Bacillaceae	Ornithinibacillus			0	0	0.833	0.056
Firmicutes	Bacilli	Bacillales	Bacillaceae	Bacillus			0	0	0.833	0.056
Firmicutes	Bacilli	Bacillales	Bacillaceae	Bacillus	Bacillus acidicola		0.056	0	0.833	0
Firmicutes	Bacilli	Bacillales	Bacillaceae	Bacillus			0	0	0.833	0.056
Firmicutes	Clostridia	Clostridiales	Family XI	Tepidimicrobium	Tepidimicrobium sp. GRC1		0.833	0	0.056	0
Proteobacteria	Gammaproteobacteria	Enterobacteriales	Enterobacteriaceae	Klebsiella			0	0	0.833	0.056
Proteobacteria	Gammaproteobacteria	Betaproteobacteriales	Burkholderiaceae	Pusillimonas			0	0	0.889	0
Actinobacteria	Actinobacteria	Micrococcales	Dermabacteraceae	Brachybacterium			0	0	0.889	0
Actinobacteria	Actinobacteria	Micrococcales	Brevibacteriaceae	Brevibacterium			0	0	0.889	0
Firmicutes	Clostridia	Clostridiales	Lachnospiraceae				0	0	0.889	0
Firmicutes	Bacilli	Lactobacillales	Enterococcaceae	Enterococcus			0	0	0.889	0
Firmicutes	Bacilli	Lactobacillales	Enterococcaceae	Enterococcus			0	0	0.889	0
Firmicutes	Bacilli	Lactobacillales	Lactobacillaceae	Lactobacillus	Lactobacillus paralimentarius		0	0	0.889	0
Firmicutes	Bacilli	Lactobacillales	Lactobacillaceae	Lactobacillus			0	0	0.889	0
Firmicutes	Bacilli	Bacillales	Bacillaceae	Bacillus			0	0	0.889	0
Firmicutes	Bacilli	Bacillales	Bacillaceae	Bacillus			0	0	0.889	0
Firmicutes	Bacilli	Bacillales	Bacillaceae				0	0	0.889	0
Firmicutes	Bacilli	Bacillales	Bacillaceae	Oceanobacillus	Oceanobacillus caeni		0	0	0.889	0
Firmicutes	Bacilli	Bacillales	Bacillaceae				0	0	0.889	0
Firmicutes	Bacilli	Bacillales	Bacillaceae	Bacillus			0	0	0.889	0
Firmicutes	Bacilli	Bacillales	Bacillaceae	Bacillus			0	0	0.889	0
Firmicutes	Bacilli	Bacillales	Bacillaceae	Bacillus			0	0	0.889	0
Firmicutes	Bacilli	Bacillales	Bacillaceae	Bacillus	Bacillus flexus		0	0	0.889	0
Firmicutes	Bacilli	Bacillales	Bacillaceae	Bacillus			0	0	0.889	0
Firmicutes	Bacilli	Bacillales	Planococcaceae	Lysinibacillus			0	0	0.889	0
Bacteroidetes	Bacteroidia	Sphingobacteriales	Sphingobacteriaceae	Sphingobacterium			0	0	0.833	0
Firmicutes	Bacilli	Lactobacillales	Enterococcaceae	Enterococcus			0	0	0.833	0
Firmicutes	Bacilli	Lactobacillales	Enterococcaceae				0	0	0.833	0
Firmicutes	Bacilli	Lactobacillales	Enterococcaceae	Enterococcus			0	0	0.833	0
Firmicutes	Bacilli	Lactobacillales	Enterococcaceae	Enterococcus			0	0	0.833	0
Firmicutes	Bacilli	Lactobacillales	Lactobacillaceae	Lactobacillus	Lactobacillus paralimentarius		0	0	0.833	0
Firmicutes	Bacilli	Lactobacillales	Lactobacillaceae	Lactobacillus	Lactobacillus reuteri		0	0	0.833	0
Firmicutes	Bacilli	Bacillales					0	0	0.833	0
Firmicutes	Bacilli	Bacillales	Family XII	Exiguobacterium			0	0	0.833	0
Firmicutes	Bacilli	Bacillales	Bacillaceae	Gracilibacillus			0	0	0.833	0
Firmicutes	Bacilli	Bacillales	Bacillaceae				0	0	0.833	0
Firmicutes	Bacilli	Bacillales	Bacillaceae	Oceanobacillus			0	0	0.833	0
Firmicutes	Bacilli	Bacillales	Thermoactinomycetaceae	Kroppenstedtia			0	0	0.833	0
Firmicutes	Bacilli	Bacillales	Thermoactinomycetaceae	Kroppenstedtia			0	0	0.833	0
Firmicutes	Bacilli	Bacillales	Bacillaceae	Bacillus			0	0	0.833	0
Firmicutes	Bacilli	Bacillales	Bacillaceae	Bacillus			0	0	0.833	0
Firmicutes	Bacilli	Bacillales	Bacillaceae	Bacillus			0	0	0.833	0
Firmicutes	Bacilli	Bacillales	Bacillaceae	Bacillus			0	0	0.833	0
Firmicutes	Bacilli	Bacillales	Planococcaceae	Kurthia	Kurthia sp. PAOGL173		0	0	0.833	0
Firmicutes	Bacilli	Bacillales	Planococcaceae	Lysinibacillus			0	0	0.833	0
Firmicutes	Bacilli	Lactobacillales	Enterococcaceae	Enterococcus	Enterococcus diestrammenae		0	0	0.833	0
Firmicutes	Bacilli	Lactobacillales	Enterococcaceae	Enterococcus	Enterococcus diestrammenae		0	0	0.833	0
Bacteroidetes	Bacteroidia	Flavobacteriales	Flavobacteriaceae	Flavobacterium			0	0	0.833	0
The core ASVs were computed using a prevalence threshold at 80%.
Abbreviations: REF, reference diet; IM, insect meal diet; DID, distal intestine digesta; DIM, distal intestine mucosa.
